# Supplementary material for: Properties of a Novel Salmonella Phage L66 and Its Application Based on Electrochemical Sensor-Combined AuNPs to Detect Salmonella
Source: MDPI journal article supplement (doi:10.3390/foods11182836), 2022-09-13
Supplement: s1 [file s1]

Supplementary information

# Properties of a Novel *Salmonella* Phage L66 and its Application Based on Electrochemical Sensor-Combined AuNPs to Detect *Salmonella*

Changbin Li <sup>1,2</sup>, Yuanshang Wang <sup>1</sup>, Jia Wang <sup>1</sup> and Xiaohong Wang <sup>1,3,\*</sup>

<sup>1</sup> College of Food Science and Technology, Huazhong Agricultural University, Wuhan 430070, China

<sup>2</sup> College of Food and Biology Engineering, Henan University of Animal Husbandry and Economy, Zhengzhou 450046, China

<sup>3</sup> Key Laboratory of Environment Correlative Dietology, Huazhong Agricultural University, Wuhan 430070, China

\* Correspondence: wxh@mail.hzau.edu.cn; Tel.: +86-027-8728-2111

**Table S1.** Host spectrum of phage L66.

| Number | G <sup>+</sup> /G <sup>-</sup> | Strain      | Source | R/S | Species               | Lytic ability |
|--------|--------------------------------|-------------|--------|-----|-----------------------|---------------|
| 1      | G <sup>-</sup>                 | SJTUF 10978 | LC     | S   | <i>S. Enteritidis</i> | +++           |
| 2      | G <sup>-</sup>                 | SJTUF 10984 | LC     | S   | <i>S. Enteritidis</i> | ++            |
| 3      | G <sup>-</sup>                 | 38          | LC     | R   | <i>S. Enteritidis</i> | +++           |
| 4      | G <sup>-</sup>                 | 39          | LC     | R   | <i>S. Enteritidis</i> | +++           |
| 5      | G <sup>-</sup>                 | 42          | LC     | R   | <i>S. Enteritidis</i> | +++           |
| 6      | G <sup>-</sup>                 | 201         | LC     | R   | <i>S. Enteritidis</i> | +             |
| 7      | G <sup>-</sup>                 | 211         | LC     | R   | <i>S. Enteritidis</i> | ++            |
| 8      | G <sup>-</sup>                 | 10960       | LC     | R   | <i>S. Enteritidis</i> | ++            |
| 9      | G <sup>-</sup>                 | 11561       | LC     | R   | <i>S. Enteritidis</i> | +++           |
| 10     | G <sup>-</sup>                 | ATCC 14028  | ATCC   | S   | <i>S. Typhimurium</i> | +++           |
| 11     | G <sup>-</sup>                 | ATCC 13311  | ATCC   | S   | <i>S. Typhimurium</i> | +             |
| 12     | G <sup>-</sup>                 | 30          | LC     | R   | <i>S. Typhimurium</i> | —             |
| 13     | G <sup>-</sup>                 | 36          | LC     | R   | <i>S. Typhimurium</i> | —             |
| 14     | G <sup>-</sup>                 | 114         | LC     | R   | <i>S. Typhimurium</i> | ++            |
| 15     | G <sup>-</sup>                 | 172         | LC     | R   | <i>S. Typhimurium</i> | +             |
| 16     | G <sup>-</sup>                 | 206         | LC     | R   | <i>S. Typhimurium</i> | +++           |
| 17     | G <sup>-</sup>                 | 10855       | LC     | R   | <i>S. Typhimurium</i> | ++            |
| 18     | G <sup>-</sup>                 | SJTUF 13306 | LC     | R   | <i>S. Typhimurium</i> | ++            |
| 19     | G <sup>-</sup>                 | SJTUF 13277 | LC     | R   | <i>S. Typhimurium</i> | +             |
| 20     | G <sup>-</sup>                 | SJTUF 13336 | LC     | R   | <i>S. Typhimurium</i> | ++            |
| 21     | G <sup>-</sup>                 | SJTUF 13337 | LC     | R   | <i>S. Typhimurium</i> | ++            |
| 22     | G <sup>-</sup>                 | SJTUF 13350 | LC     | R   | <i>S. Typhimurium</i> | ++            |
| 23     | G <sup>-</sup>                 | UK-1        | LC     | S   | <i>S. Typhimurium</i> | +++           |
| 24     | G <sup>-</sup>                 | NCTC 12900  | NCTC   | S   | <i>E. coli</i>        | —             |
| 25     | G <sup>-</sup>                 | ATCC 25923  | ATCC   | S   | <i>E. coli</i>        | —             |
| 26     | G <sup>-</sup>                 | 12900       | LC     | S   | <i>E. coli</i>        | —             |
| 27     | G <sup>-</sup>                 | ATCC 29544  | ATCC   | S   | <i>E. coli</i>        | —             |
| 28     | G <sup>-</sup>                 | DH5α        | LC     | S   | <i>E. coli</i>        | —             |
| 29     | G <sup>-</sup>                 | CICC10662   | CICC   | S   | <i>E. coli</i>        | —             |
| 30     | G <sup>-</sup>                 | CICC10664   | CICC   | S   | <i>E. coli</i>        | —             |
| 31     | G <sup>-</sup>                 | CICC10667   | CICC   | S   | <i>E. coli</i>        | —             |
| 32     | G <sup>-</sup>                 | CICC10669   | CICC   | S   | <i>E. coli</i>        | —             |

|    |                |            |      |   |                                |     |
|----|----------------|------------|------|---|--------------------------------|-----|
| 33 | G <sup>-</sup> | 17         | LC   | R | <i>S. Agonistes</i>            | +   |
| 34 | G <sup>-</sup> | 19         | LC   | R | <i>S. Agonistes</i>            | +   |
| 35 | G <sup>-</sup> | 21         | LC   | R | <i>S. Agonistes</i>            | +   |
| 36 | G <sup>-</sup> | 3710       | LC   | S | <i>S. Dublin</i>               | ++  |
| 37 | G <sup>-</sup> | 3723       | LC   | S | <i>S. Dublin</i>               | ++  |
| 38 | G <sup>-</sup> | CVCC 534   | CVCC | S | <i>S. Pullorum</i>             | ++  |
| 39 | G <sup>-</sup> | CVCC 519   | CVCC | S | <i>S. Pullorum</i>             | +++ |
| 40 | G <sup>-</sup> | 13500      | LC   | R | <i>S. Indiana</i>              | ++  |
| 41 | G <sup>-</sup> | 13520      | LC   | R | <i>S. Indiana</i>              | ++  |
| 42 | G <sup>-</sup> | ATCC 9270  | ATCC | S | <i>S. Duck</i>                 | +   |
| 43 | G <sup>-</sup> | ATCC 10708 | ATCC | S | <i>S. Choleraesuis</i>         | —   |
| 44 | G <sup>+</sup> | ATCC 19114 | ATCC | S | <i>Listeria monocytogenes</i>  | —   |
| 45 | G <sup>-</sup> | 33846      | ATCC | S | <i>Vibrio parahaemolyticus</i> | —   |
| 46 | G <sup>+</sup> | 260031     | CMCC | S | <i>S. aureus</i>               | —   |
| 47 | G <sup>+</sup> | 25923      | ATCC | S | <i>S. aureus</i>               | —   |
| 48 | G <sup>+</sup> | ATCC 29213 | ATCC | S | <i>S. aureus</i>               | —   |
| 49 | G <sup>+</sup> | ATCC 6538  | ATCC | S | <i>S. aureus</i>               | —   |

Note: G<sup>+</sup> for Gram-positive bacteria, G<sup>-</sup> for Gram-negative bacteria. R for Resistant strain, S for Sensitive strain. "++++, ++, +, -," refer to the different ability to infect different host bacteriophages of phages. "++++" indicates very transparent and clear phage spot, "+++" indicates clear and transparent phage spot, "+" indicates a hazy background of phage spot, and "-" indicates no phage spot phenomenon. "LC" refer to Laboratory collection.
